# Supplementary material
Source: PubMed Central journal article supplement (PMC5829806)
Supplement: JSLHR-H-16-0152hunter_Supp4.pdf [file JSLHR-H-16-0152hunter_Supp4.pdf]

**Supplemental Material S4.** Correlation matrix for Year 2 speech-language measures, controlling for chronological age.

| Year 2 speech-language measure                | Year 2 speech-language measure |        |        |        |   |
|-----------------------------------------------|--------------------------------|--------|--------|--------|---|
|                                               | 1                              | 2      | 3      | 4      | 5 |
| 1. PSI–Sentences ( $n = 20$ )                 | —                              |        |        |        |   |
| 2. PSI–Words ( $n = 18$ )                     | .84***                         | —      |        |        |   |
| 3. Reynell–Expressive ( $n = 21$ )            | .59**                          | .79*** | —      |        |   |
| 4. Reynell–Receptive ( $n = 23$ )             | .41                            | .78*** | .89*** | —      |   |
| 5. Mr. Potato Head <sup>TM</sup> ( $n = 20$ ) | .67**                          | .81*** | .80*** | .78*** | — |

Note. PSI = Pediatric Speech Intelligibility Test; Reynell = Reynell Developmental Language Scales II.

\* $p < .05$ . \*\* $p < .01$ . \*\*\* $p < .001$ .

**References**

- Jerger, S., & Jerger, J. (1984). *Pediatric Speech Intelligibility Test: Manual for administration*. St. Louis, MO: Auditec.
- Reynell, J., & Gruber, C. (1990). *Reynell Developmental Language Scales II: Manual*. Los Angeles, CA: Western Psychological Services.
- Robbins, A. M. (1994). *The Mr. Potato Head task*. Indianapolis, IN: Indiana University School of Medicine.
